# Supplementary material for: Mixed ionic/electronic conductors Sr2Fe2O5 and Sr4Fe6O13: atomic-scale studies of defects and ion migration
Source: Royal Society of Chemistry journal article supplement (doi:10.1039/b418567f), 2005-01-01
Supplement: b418567f.pdf [file b418567f.pdf]

Calculated and Experimental Properties of the Perfect Crystal Lattices of  
 $\text{Sr}_2\text{Fe}_2\text{O}_5$  and  $\text{Sr}_4\text{Fe}_6\text{O}_{13}$

(a) Elastic Constants (GPa)

|          | $\text{Sr}_2\text{Fe}_2\text{O}_5$ | $\text{Sr}_4\text{Fe}_6\text{O}_{13}$ |
|----------|------------------------------------|---------------------------------------|
| $c_{11}$ | 281.2                              | 307.2                                 |
| $c_{12}$ | 113.1                              | 123.4                                 |
| $c_{13}$ | 63.6                               | 75.7                                  |
| $c_{33}$ | 269.4                              | 308.3                                 |
| $c_{44}$ | 91.2                               | 106.3                                 |
| $c_{66}$ | 59.2                               | 108.6                                 |

(b) Dielectric Constants

|                         | $\text{Sr}_2\text{Fe}_2\text{O}_5$ | $\text{Sr}_4\text{Fe}_6\text{O}_{13}$ |
|-------------------------|------------------------------------|---------------------------------------|
| $\epsilon_0$            | 7.12                               | 12.02                                 |
| $\epsilon_{\text{inf}}$ | 2.16                               | 2.32                                  |

Lattice energies for binary oxides

| Formula<br>Unit                | Experiment <sup>45</sup><br>(eV) | Simulation<br>(eV) |
|--------------------------------|----------------------------------|--------------------|
| FeO                            | -39.333                          | -40.15             |
| Fe <sub>2</sub> O <sub>3</sub> | -148.304                         | -147.66            |
| SrO                            | -33.342                          | -35.72             |
| CoO                            | -39.768                          | -40.85             |
